# Supplementary material for: Validation of Immunotherapy Response Score as Predictive of Pan-solid Tumor Anti-PD-1/PD-L1 Benefit
Source: PubMed Central journal article supplement (PMC10367935; doi:10.1158/2767-9764.crc-23-0036), 2023-07-25
Supplement: crc-23-0036-s01.pdf [file crc-23-0036-s01.pdf]

# Supplementary Figure S1

**A**

ADAM12.E10E11.NM\_003474.4  
 Pearson r (within bounds)= 0.961 (95%CI 0.941-0.974) p=8.3651e-52  
 Linear fit:  $y=0.96x-0.50$

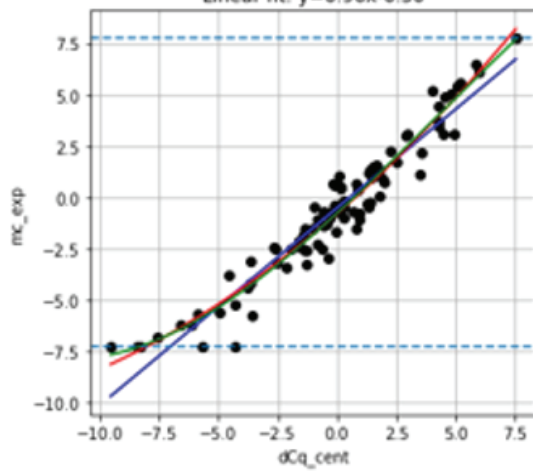

**B**

CD274.E4E5.NM\_014143.3  
 Pearson r (within bounds)= 0.959 (95%CI 0.939-0.973) p=2.1373e-53  
 Linear fit:  $y=1.06x-0.77$

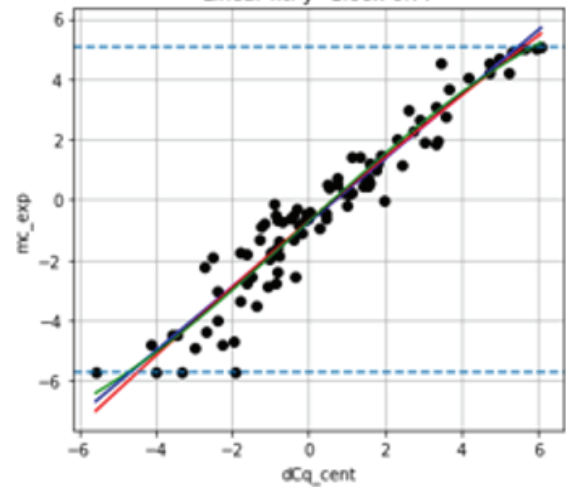

**C**

NM\_001067:TOP2A.E21E22  
 Pearson r (within bounds)= 0.969 (95%CI 0.954-0.979) p=8.5062e-59  
 Linear fit:  $y=1.13x-0.07$

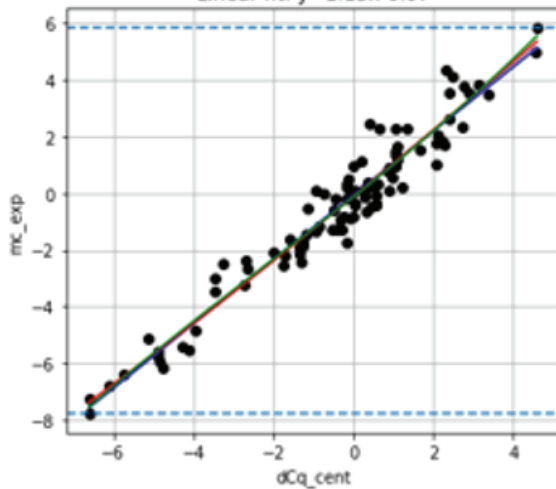

**D**

NM\_005018:PDCD1.E1E2  
 Pearson r (within bounds)= 0.946 (95%CI 0.918-0.964) p=8.6717e-43  
 Linear fit:  $y=1.03x-1.65$

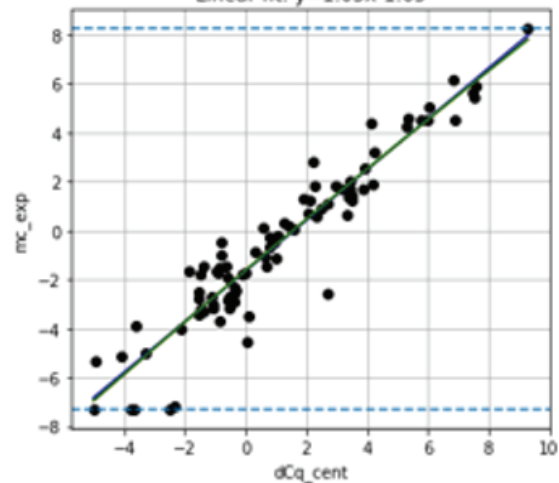

| IRS Target    | Within LOQ bound Pearson correlation coefficient (r) | Lower LOQ (12nRPM) | Upper LOQ (12nRPM) | Linear Range (fold) |
|---------------|------------------------------------------------------|--------------------|--------------------|---------------------|
| <i>ADAM12</i> | 0.961                                                | -7.26              | 7.79               | 33,855x             |
| <i>PD-L1</i>  | 0.959                                                | -5.72              | 5.05               | 1,757x              |
| <i>TOP2A</i>  | 0.969                                                | -7.76              | 5.83               | 12,368x             |
| <i>PD-1</i>   | 0.946                                                | -7.30              | 8.24               | 47,803x             |

**Supplementary Figure S1. Accuracy and linearity of Immunotherapy Response Score (IRS) expression components by quantitative transcriptional profiling vs. qRT-PCR**

**A-D.** Normalized target gene expression for all four expression components of IRS (*ADAM12* [A], *PD-L1* [CD274; B], *TOP2A* [C] and *PD-1* [*PDCDI*; D] were determined by quantitative transcriptional profiling (performed in parallel with clinical StrataNGS CGP testing; y axis [mc\_exp]) and qRT-PCR (x axis [dCq\_cent]) from replicate RNA aliquots of 96 FFPE tumor tissues. Median-centered log<sub>2</sub> values for each target gene are plotted. Blue, red, and green lines are linear (1<sup>st</sup>), 2<sup>nd</sup> order, and 3<sup>rd</sup> order models, respectively. Polynomial terms were not significant (all p>0.05) for any of the genes. Blue dashed lines are lower and upper limit of quantification (LOQ). The amplicon name, within LOQ bound Pearson correlation coefficient (*r*) with 95% confidence interval (CI), p-value, and linear fit equation are shown for each IRS expression component gene. The table below the individual plots shows the linear range (from lower to upper LOQ) for each gene.
