# Supplementary material for: Validation of Immunotherapy Response Score as Predictive of Pan-solid Tumor Anti-PD-1/PD-L1 Benefit
Source: PubMed Central journal article supplement (PMC10367935; doi:10.1158/2767-9764.crc-23-0036), 2023-07-25
Supplement: crc-23-0036-s07.pdf [file crc-23-0036-s07.pdf]

# Supplementary Figure S7

## Anti-PD-(L)1 and/or chemotherapy validation cohort

(covariate adjusted)

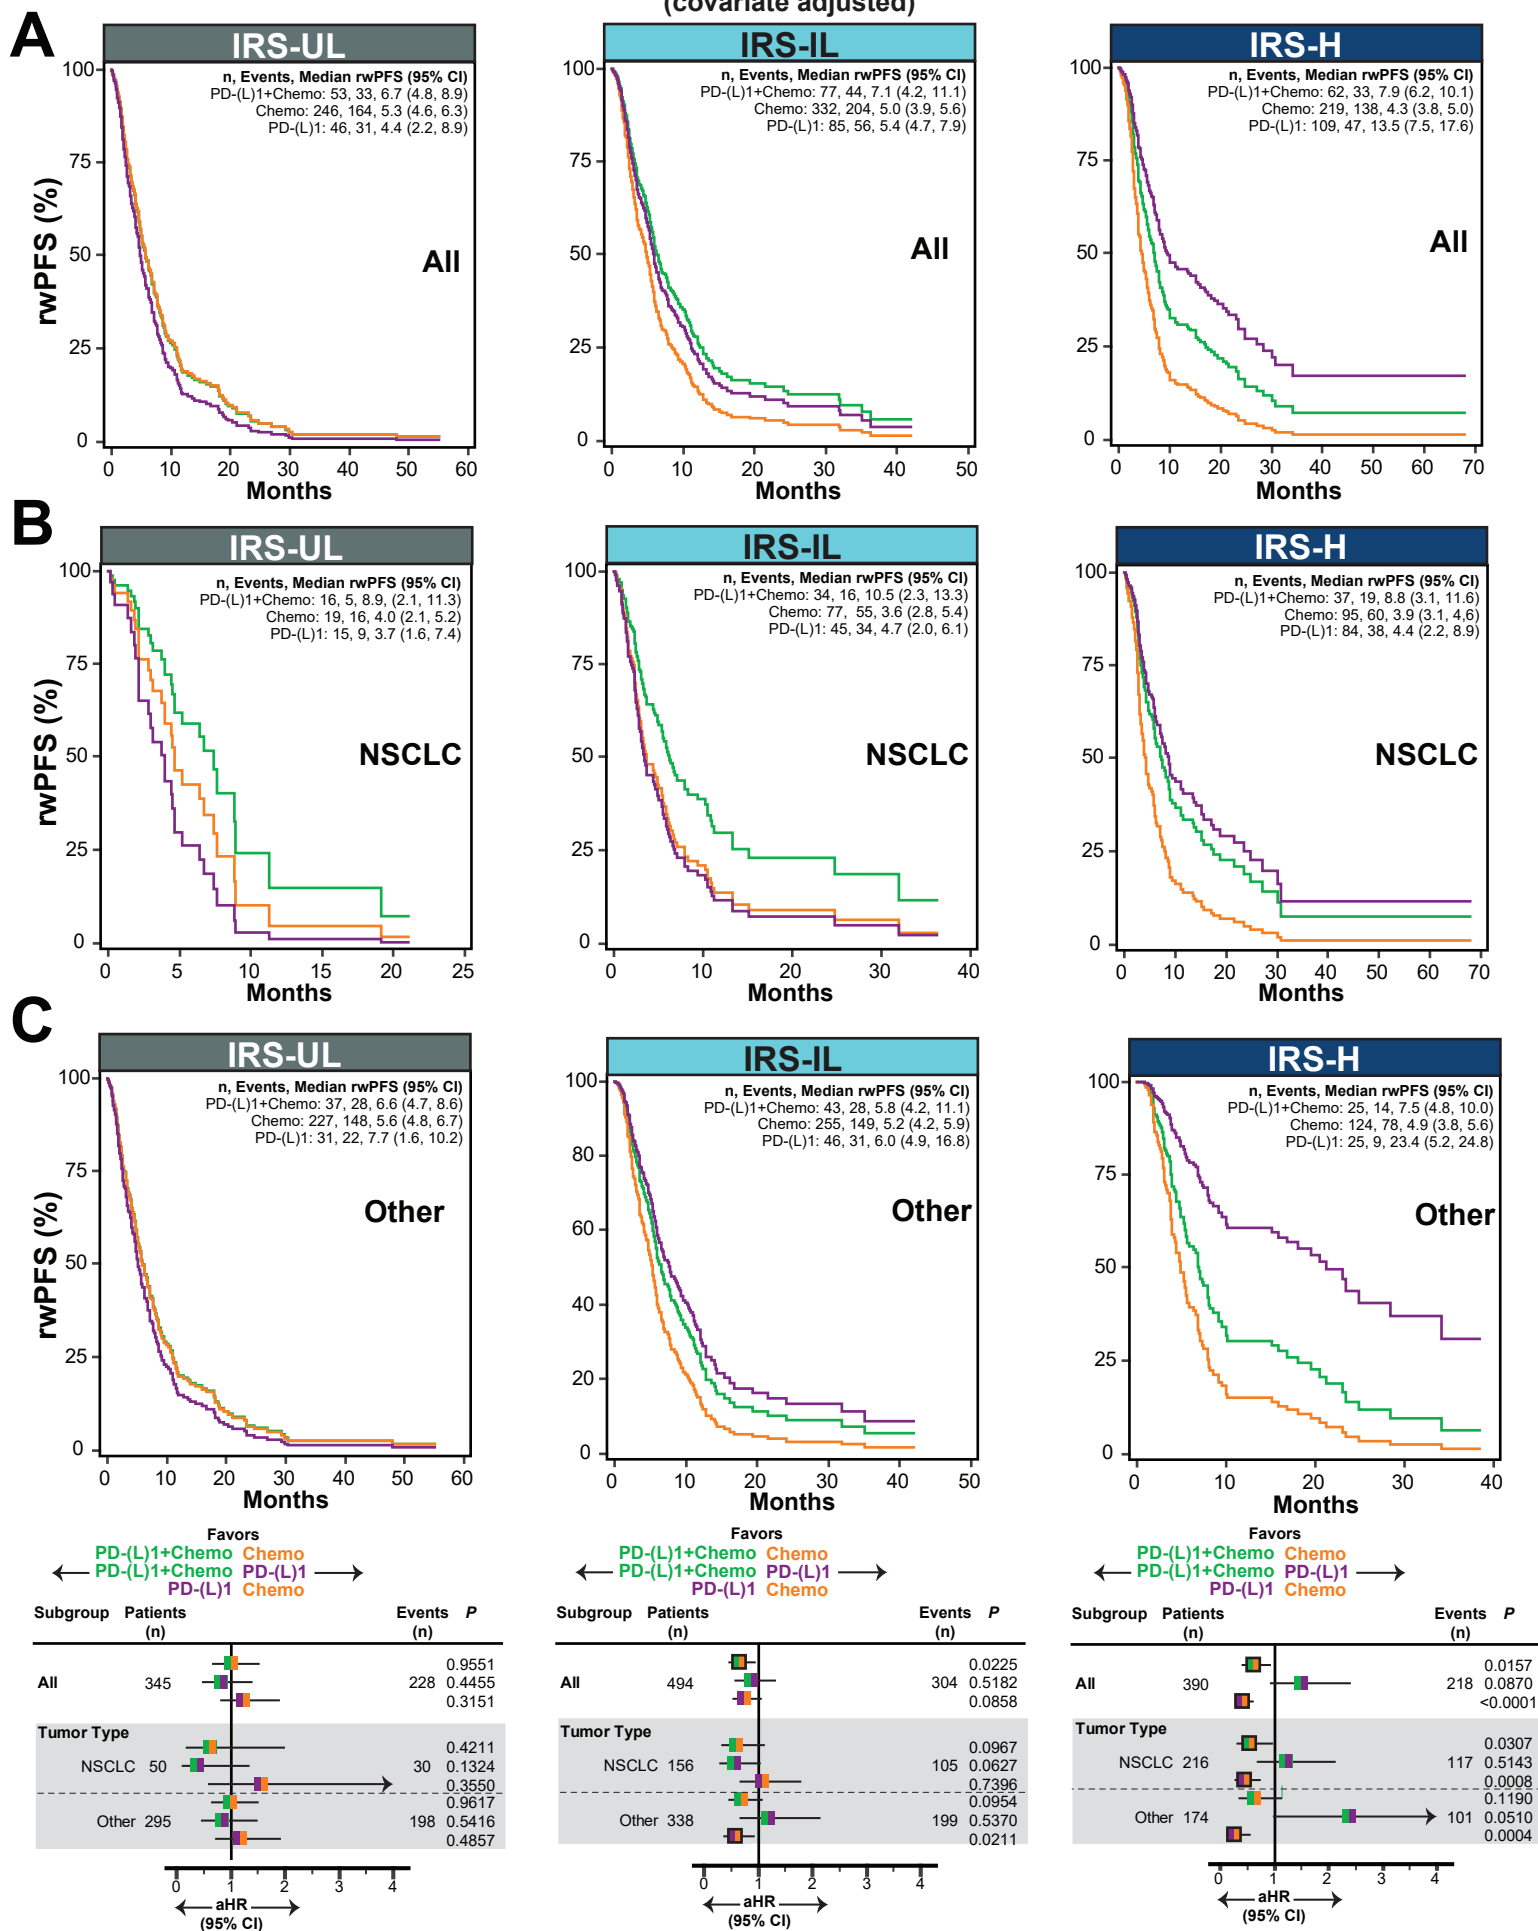

**Supplementary Figure S7. Covariate adjusted Kaplan-Meier analysis of the anti-PD-(L)1 and/or chemotherapy (chemo) validation cohort**

**A.** As in **Figure 4B**, except the Kaplan-Meier visualization of the anti-PD-(L)1 and/or chemotherapy (chemo) validation cohort (n=1,229 treatment lines) in each Immunotherapy Response Score (IRS) group was performed using covariate adjustment. **B.** As in **A**, except showing the non-small cell lung cancer (NSCLC) subgroup. Forest plot of hazard ratios is shown as in **Figure 4B**. **C.** As in **A**, except showing the other four tumor type (Other; triple negative breast cancer, esophagogastric, head and neck cancer, and small cell lung cancer) subgroups.
