# Supplementary material for: Validation of Immunotherapy Response Score as Predictive of Pan-solid Tumor Anti-PD-1/PD-L1 Benefit
Source: PubMed Central journal article supplement (PMC10367935; doi:10.1158/2767-9764.crc-23-0036), 2023-07-25
Supplement: crc-23-0036-s11.pdf [file crc-23-0036-s11.pdf]

**Supplementary Table S2: Adjusted Cox proportional hazards model for anti-PD-(L)1 monotherapy real-world progression free survival (rwPFS) and overall survival (OS) in the monotherapy validation cohort (n=352)**

| Covariate                                      | rwPFS                     |         | OS                        |         |
|------------------------------------------------|---------------------------|---------|---------------------------|---------|
|                                                | HR (95% CI)               | p-value | HR (95% CI)               | p-value |
| Age (yrs; continuous)                          | 0.995 (0.9809 to 1.0093)  | 0.4913  | 0.9937 (0.9779 to 1.0099) | 0.4451  |
| Sex (Male vs. Female)                          | 0.7307 (0.5308 to 1.0060) | 0.0544  | 0.7522 (0.5239 to 1.0801) | 0.1229  |
| Line of Therapy (continuous)                   | 1.1471 (0.9612 to 1.3689) | 0.1282  | 1.1857 (0.9841 to 1.4286) | 0.0732  |
| Tumor Type (Bladder vs. Other)                 | 1.314 (0.6808 to 2.5361)  | 0.4156  | 1.2523 (0.5596 to 2.8024) | 0.5841  |
| Tumor Type (CUP vs. Other)                     | 1.1033 (0.6087 to 2.0000) | 0.7459  | 1.5385 (0.8092 to 2.9252) | 0.1888  |
| Tumor Type (Esophagogastric vs. Other)         | 1.8144 (0.9607 to 3.4267) | 0.0663  | 3.2582 (1.6792 to 6.3220) | 0.0005  |
| Tumor Type (Head and Neck vs. Other)           | 1.3932 (0.7394 to 2.6252) | 0.3049  | 2.0698 (1.0431 to 4.1070) | 0.0375  |
| Tumor Type (Melanoma vs. Other)                | 0.7624 (0.3582 to 1.6227) | 0.4815  | 0.516 (0.1762 to 1.5111)  | 0.2275  |
| Tumor Type (NSCLC vs. Other)                   | 2.0562 (1.3541 to 3.1223) | 0.0007  | 2.0547 (1.2671 to 3.3317) | 0.0035  |
| anti-PD-(L)1 therapy (Pembrolizumab vs. other) | 0.8367 (0.5554 to 1.2606) | 0.394   | 0.7593 (0.4758 to 1.2119) | 0.2484  |
| IRS status (High vs. Low)                      | 0.4078 (0.2903 to 0.5730) | <0.0001 | 0.4742 (0.3211 to 0.7003) | 0.0002  |

Associations of covariates with pembrolizumab rwPFS and OS was performed using Cox proportional hazards modeling adjusting for age (years [yrs]; continuous), sex assigned at birth, line of systemic therapy (continuous), Tumor Type (all tumor types with >15 samples were considered separately; remaining tumor types were grouped into a single category [Other]), anti-PD-(L)1 therapy (pembrolizumab vs. other) and Immunotherapy Response Score (IRS) status (-High vs. -Low). The hazard ratio (HR) for each covariate in the full model in the overall 352 patient cohort (see Fig. 1B&C) is shown, along with 95% confidence interval (CI), and p-values.
