# Supplementary material for: Validation of Immunotherapy Response Score as Predictive of Pan-solid Tumor Anti-PD-1/PD-L1 Benefit
Source: PubMed Central journal article supplement (PMC10367935; doi:10.1158/2767-9764.crc-23-0036), 2023-07-25
Supplement: crc-23-0036-s12.pdf [file crc-23-0036-s12.pdf]

**Supplementary Table S3. Unadjusted restricted mean survival time (RMST) analysis of anti-PD-(L)1 monotherapy real-world PFS (rwPFS) and overall survival (OS) stratified by IRS status in the monotherapy validation cohort**

| Endpoint | Restricted Time |            | RMST Estimate    |         |
|----------|-----------------|------------|------------------|---------|
|          | (tau)           | IRS Status | (95% CI)         | p-value |
| rwPFS    | 24 months       | IRS-L      | 7.3 (5.9-8.8)    | <0.0001 |
|          | 24 months       | IRS-H      | 14.2 (12.3-16.0) |         |
| OS       | 36 months       | IRS-L      | 16.7 (14.2-19.1) | <0.0001 |
|          | 36 months       | IRS-H      | 24.2 (21.5-26.9) |         |

As in **Figure 1B&C** except unadjusted RMST analysis was used to compare anti-PD-(L)1 monotherapy rwPFS (at 24 months) and OS (at 36 months) stratified by IRS status. p-value is for the test of RMST equality between IRS-L and IRS-H.
