# Supplementary material for: Validation of Immunotherapy Response Score as Predictive of Pan-solid Tumor Anti-PD-1/PD-L1 Benefit
Source: PubMed Central journal article supplement (PMC10367935; doi:10.1158/2767-9764.crc-23-0036), 2023-07-25
Supplement: crc-23-0036-s13.pdf [file crc-23-0036-s13.pdf]

Supplementary Table S4. Demographics and tumor type of the subset of patients used in the case cross-over analysis (treated with anti-PD-(L)1 monotherapy in the >1st line)

| Variable                          | Statistic                                   | Anti-PD-(L)1 mono case cross-over cohort n (%) |
|-----------------------------------|---------------------------------------------|------------------------------------------------|
| Age (yrs)                         | n                                           | 107                                            |
|                                   | median (IQR)                                | 63 (54-71.5)                                   |
| Sex                               | n (%)                                       |                                                |
|                                   | Female<br>Male                              | 53 (49.5%)<br>54 (50.5%)                       |
| Race                              | n (%)                                       |                                                |
|                                   | Asian                                       | 2 (1.9%)                                       |
|                                   | Black or African American                   | 8 (7.5%)                                       |
|                                   | Other                                       | 3 (2.8%)                                       |
|                                   | Unknown, Missing, or Not Reported           | 31 (29.0%)                                     |
| White or Caucasian                | 63 (58.9%)                                  |                                                |
| Ethnicity                         | n (%)                                       |                                                |
|                                   | Hispanic or Latino                          | 1 (0.9%)                                       |
|                                   | Not Hispanic or Latino                      | 69 (64.5%)                                     |
| Unknown, Missing, or Not Reported | 37 (34.6%)                                  |                                                |
| Anti-PD-(L)1 line of therapy      | n (%)                                       |                                                |
|                                   | 1                                           | 0 (0%)                                         |
|                                   | 2                                           | 71 (66.4%)                                     |
| 3+                                | 36 (33.6%)                                  |                                                |
| Anti-PD-(L)1 therapy type         | n (%)                                       |                                                |
|                                   | pembrolizumab<br>other anti-PD-(L)1 therapy | 82 (76.6%)<br>25 (23.4%)                       |
| Primary Tumor Type                | n (%)                                       |                                                |
|                                   | Adrenocortical Carcinoma                    | 1 (0.9%)                                       |
|                                   | Ampullary Carcinoma                         | 1 (0.9%)                                       |
|                                   | Bladder Cancer                              | 7 (6.5%)                                       |
|                                   | Breast Cancer                               | 5 (4.7%)                                       |
|                                   | Cancer of Unknown Primary                   | 15 (14.0%)                                     |
|                                   | Cervical Cancer                             | 4 (3.7%)                                       |
|                                   | Colorectal Cancer                           | 8 (7.5%)                                       |
|                                   | Endometrial Cancer                          | 4 (3.7%)                                       |
|                                   | Esophagogastric Cancer                      | 12 (11.2%)                                     |
|                                   | Glioma                                      | 1 (0.9%)                                       |
|                                   | Head and Neck Cancer                        | 8 (7.5%)                                       |
|                                   | Hepatobiliary Cancer                        | 2 (1.9%)                                       |
|                                   | Lymphoma                                    | 1 (0.9%)                                       |
|                                   | Melanoma                                    | 2 (1.9%)                                       |
|                                   | Non-Small Cell Lung Cancer                  | 15 (14.0%)                                     |
|                                   | Other Cancer                                | 3 (2.8%)                                       |
|                                   | Ovarian Cancer                              | 2 (1.9%)                                       |
|                                   | Pancreatic Cancer                           | 4 (3.7%)                                       |
|                                   | Prostate Cancer                             | 2 (1.9%)                                       |
|                                   | Renal Cell Carcinoma                        | 2 (1.9%)                                       |
|                                   | Sarcoma                                     | 5 (4.7%)                                       |
|                                   | Skin Cancer, Non-Melanoma                   | 1 (0.9%)                                       |
| Small Cell Lung Cancer            | 1 (0.9%)                                    |                                                |
| Vaginal Cancer                    | 1 (0.9%)                                    |                                                |
| Preceding therapy line type       | n (%)                                       |                                                |
|                                   | Antibody/Antibody drug conjugate            | 6 (5.6%)                                       |
|                                   | Antibody+chemotherapy                       | 4 (3.7%)                                       |
|                                   | Angiogenesis antibody                       | 2 (1.9%)                                       |
|                                   | Angiogenesis antibody+chemotherapy          | 12 (11.2%)                                     |
|                                   | Angiogenesis TKI                            | 2 (1.9%)                                       |
|                                   | Antibody+oncogene                           | 1 (0.9%)                                       |
|                                   | CDK4/6 inhibitor                            | 1 (0.9%)                                       |
|                                   | CDK4/6 inhibitor + chemotherapy             | 1 (0.9%)                                       |
|                                   | Chemotherapy                                | 63 (58.9%)                                     |
|                                   | Chemotherapy+oncogene TKI                   | 2 (1.9%)                                       |
|                                   | Chemotherapy+PARP inhibitor                 | 1 (0.9%)                                       |
|                                   | Hormonal Therapy                            | 1 (0.9%)                                       |
|                                   | Oncogene TKI                                | 9 (8.4%)                                       |
|                                   | PARP inhibitor                              | 2 (1.9%)                                       |

Demographics and tumor types for all included patients in the case cross-over analysis (requiring systemic therapy prior to anti-PD-(L)1 monotherapy treatment) including age (in years), sex, self reported race, self reported ethnicity, and the anti-PD-(L)1 line of systemic therapy. The StrataNGS CGP assigned primary tumor type for each patient is provided. The type of anti-PD-(L)1 therapy is indicated. The type of therapy for the systemic therapy line immediately preceding the anti-PD-(L)1 monotherapy line is reported. n= sample size, %= percentage, std= standard deviation, IQR = interquartile range.
