# Supplementary material for: Validation of Immunotherapy Response Score as Predictive of Pan-solid Tumor Anti-PD-1/PD-L1 Benefit
Source: PubMed Central journal article supplement (PMC10367935; doi:10.1158/2767-9764.crc-23-0036), 2023-07-25
Supplement: crc-23-0036-s14.pdf [file crc-23-0036-s14.pdf]

**Supplementary Table S5. Rates of rwPFS2 (PD-[L]1)/rwPFS1 (immediately preceding therapy) in the case cross-over analysis of patients treated with anti-PD-(L)1 monotherapy in the >1st line**

| Group/IRS        | rwPFS2/rwPFS1 <1.3 |      | Cochran-Mantel-Haenszel |          |         |
|------------------|--------------------|------|-------------------------|----------|---------|
|                  | <=1.3              | >1.3 | Odds Ratio              | 95% CI   | P value |
| <b>Overall</b>   |                    |      |                         |          |         |
| IRS-H            | 5                  | 13   | 6.62                    | 2.2-20.2 | 0.0005  |
| IRS-L            | 45                 | 14   |                         |          |         |
| <b>MSS/TMB-L</b> |                    |      |                         |          |         |
| IRS-H            | 1                  | 3    | 4.4                     | 1.1-16.9 | 0.03    |
| IRS-L            | 45                 | 14   |                         |          |         |

All patients with rwPFS2 events at <=1.3 rwPFS2/rwPFS1 and those censored at >1.3 rwPFS2/rwPFS1 from the overall case cross-over cohort (n=107) and the MSS/TMB-L subset (n=86) were evaluated for rate of rwPFS2/rwPFS1 >1.3. Rates were compared by Cochran-Mantel-Haenszel odds ratio test stratified by tumor type.
