# Supplementary material for: Validation of Immunotherapy Response Score as Predictive of Pan-solid Tumor Anti-PD-1/PD-L1 Benefit
Source: PubMed Central journal article supplement (PMC10367935; doi:10.1158/2767-9764.crc-23-0036), 2023-07-25
Supplement: crc-23-0036-s16.pdf [file crc-23-0036-s16.pdf]

Supplementary Table S7. Sub-group analysis of the 189 patient PD-L1 IHC cohort

| Variable             | Subgroup    | Model Term | Treatments (n) | aHR   | 95%CI Lower | 95%CI Upper | Events (n) | P      |
|----------------------|-------------|------------|----------------|-------|-------------|-------------|------------|--------|
| Tumor Type           | NSCLC       | PD-L1 IHC  | 121            | 0.915 | 0.829       | 1.011       | 64         | 0.081  |
|                      |             | TMB status |                | 1.058 | 0.552       | 2.030       |            | 0.8646 |
|                      |             | IRS status |                | 0.571 | 0.319       | 1.024       |            | 0.0601 |
|                      | Other       | PD-L1 IHC  | 68             | 1.039 | 0.876       | 1.232       | 40         | 0.6629 |
|                      |             | TMB status |                | 0.877 | 0.262       | 2.933       |            | 0.8314 |
|                      |             | IRS status |                | 0.564 | 0.210       | 1.519       |            | 0.2571 |
| PD-L1 IHC type       | TPS         | PD-L1 IHC  | 139            | 0.920 | 0.838       | 1.009       | 75         | 0.0751 |
|                      |             | TMB status |                | 0.996 | 0.535       | 1.856       |            | 0.99   |
|                      |             | IRS status |                | 0.651 | 0.374       | 1.133       |            | 0.1288 |
|                      | CPS or IC   | PD-L1 IHC  | 50             | 1.014 | 0.781       | 1.317       | 29         | 0.9147 |
|                      |             | TMB status |                | 0.850 | 0.159       | 4.544       |            | 0.8491 |
|                      |             | IRS status |                | 0.639 | 0.140       | 2.920       |            | 0.5638 |
| Cohort               | Discovery   | PD-L1 IHC  | 90             | 0.992 | 0.852       | 1.156       | 48         | 0.9191 |
|                      |             | TMB status |                | 1.737 | 0.685       | 4.407       |            | 0.245  |
|                      |             | IRS status |                | 0.373 | 0.150       | 0.931       |            | 0.0345 |
|                      | Validation  | PD-L1 IHC  | 99             | 0.909 | 0.805       | 1.025       | 56         | 0.1194 |
|                      |             | TMB status |                | 0.795 | 0.360       | 1.755       |            | 0.5704 |
|                      |             | IRS status |                | 0.600 | 0.302       | 1.192       |            | 0.1449 |
| anti-PD-(L)1 therapy | Mono        | PD-L1 IHC  | 102            | 1.025 | 0.892       | 1.176       | 55         | 0.7298 |
|                      |             | TMB status |                | 0.867 | 0.406       | 1.854       |            | 0.7135 |
|                      |             | IRS status |                | 0.398 | 0.206       | 0.767       |            | 0.006  |
|                      | Chemo combo | PD-L1 IHC  | 87             | 0.879 | 0.773       | 1.000       | 49         | 0.0493 |
|                      |             | TMB status |                | 1.251 | 0.486       | 3.219       |            | 0.6428 |
|                      |             | IRS status |                | 0.865 | 0.362       | 2.068       |            | 0.7441 |
| Gender               | Female      | PD-L1 IHC  | 84             | 0.984 | 0.864       | 1.120       | 48         | 0.8028 |
|                      |             | TMB status |                | 0.906 | 0.389       | 2.108       |            | 0.8186 |
|                      |             | IRS status |                | 0.717 | 0.367       | 1.402       |            | 0.3311 |
|                      | Male        | PD-L1 IHC  | 105            | 0.865 | 0.748       | 0.999       | 56         | 0.0487 |
|                      |             | TMB status |                | 1.104 | 0.446       | 2.735       |            | 0.8304 |
|                      |             | IRS status |                | 0.586 | 0.241       | 1.423       |            | 0.2374 |
| Age                  | <65 yrs     | PD-L1 IHC  | 83             | 0.897 | 0.784       | 1.027       | 44         | 0.1149 |
|                      |             | TMB status |                | 0.483 | 0.190       | 1.225       |            | 0.1254 |
|                      |             | IRS status |                | 1.337 | 0.603       | 2.966       |            | 0.4748 |
|                      | >=65 yrs    | PD-L1 IHC  | 106            | 0.897 | 0.793       | 1.015       | 60         | 0.0852 |
|                      |             | TMB status |                | 1.624 | 0.723       | 3.647       |            | 0.2406 |
|                      |             | IRS status |                | 0.255 | 0.119       | 0.545       |            | 0.0004 |

Subgroup analysis of the 189 patients treated with anti-PD-(L)1 monotherapy or chemotherapy (chemo) + anti-PD-(L)1 with available quantitative clinical PD-L1 IHC reported in accompanying pathology reports (from Figure 2). For all subgroups (those with  $\geq 50$  per group are shown), the number of patients in the subgroup, the adjusted hazard ratio (aHR), 95% lower and upper confidence intervals (CI), the number of events in the subgroup, and the p-value (those significant in green) are shown.
