# Supplementary material for: Validation of Immunotherapy Response Score as Predictive of Pan-solid Tumor Anti-PD-1/PD-L1 Benefit
Source: PubMed Central journal article supplement (PMC10367935; doi:10.1158/2767-9764.crc-23-0036), 2023-07-25
Supplement: crc-23-0036-s18.pdf [file crc-23-0036-s18.pdf]

Supplementary Table S9. TMB-H and IRS-H status by self reported race in relevant tumor types in the SCMD compared to Nasser *et al.*

| Tumor Type                 | This Study (SCMD) |               |                   |               |                              |                   |               |                              |                   | Nassar <i>et al.</i> |                   |               |                              |                   |               |                   |               |                              |
|----------------------------|-------------------|---------------|-------------------|---------------|------------------------------|-------------------|---------------|------------------------------|-------------------|----------------------|-------------------|---------------|------------------------------|-------------------|---------------|-------------------|---------------|------------------------------|
|                            | Total n           |               | % TMB-H           |               |                              | % IRS-H           |               |                              | Total n           |                      | % TMB-H           |               |                              | Total n           |               | % TMB-H           |               |                              |
|                            | Self Non-European | Self European | Self Non-European | Self European | Fisher's exact test <i>p</i> | Self Non-European | Self European | Fisher's exact test <i>p</i> | Self Non-European | Self European        | Self Non-European | Self European | Fisher's exact test <i>p</i> | Anc. Non-European | Anc. European | Anc. Non-European | Anc. European | Fisher's exact test <i>p</i> |
| Bladder Cancer             | 99                | 316           | 16.2%             | 16.8%         | 1                            | 26.3%             | 25.6%         | 0.9                          | 20                | 587                  | 55.0%             | 52.3%         | 1                            | 22                | 585           | 63.6%             | 52.0%         | 0.39                         |
| Colorectal Cancer          | 602               | 1227          | 3.8%              | 7.3%          | <i>0.004</i>                 | 8.1%              | 11.2%         | <i>0.048</i>                 | 200               | 1612                 | 39.5%             | 26.6%         | <b><i>0.0002</i></b>         | 211               | 1601          | 38.4%             | 26.6%         | <b><i>0.0006</i></b>         |
| Esophagogastric Cancer     | 203               | 432           | 7.9%              | 3.9%          | 0.053                        | 23.2%             | 14.8%         | <b><i>0.01</i></b>           | 67                | 873                  | 32.8%             | 14.3%         | <b><i>0.003</i></b>          | 78                | 862           | 29.5%             | 14.4%         | <b><i>0.001</i></b>          |
| Head and Neck Cancer       | 81                | 247           | 2.5%              | 6.9%          | 0.18                         | 27.2%             | 21.1%         | 0.28                         | 23                | 533                  | 47.8%             | 20.8%         | <b><i>0.007</i></b>          | 27                | 529           | 37.0%             | 21.2%         | 0.06                         |
| Melanoma                   | 46                | 469           | 17.4%             | 52.0%         | <i>&lt;0.0001</i>            | 30.4%             | 58.2%         | <i>0.0005</i>                | 10                | 632                  | 40.0%             | 62.0%         | 0.19                         | 9                 | 633           | 33.3%             | 62.1%         | 0.09                         |
| Non-Small Cell Lung Cancer | 719               | 1426          | 20.4%             | 26.5%         | <i>0.002</i>                 | 41.7%             | 45.3%         | 0.12                         | 282               | 2982                 | 45.0%             | 38.2%         | <b><i>0.03</i></b>           | 291               | 2977          | 44.0%             | 38.3%         | 0.07                         |
| Renal Cell Carcinoma       | 83                | 188           | 1.2%              | 0.0%          | 0.31                         | 28.9%             | 21.8%         | 0.22                         | 12                | 356                  | 8.3%              | 10.7%         | 1                            | 17                | 351           | 17.6%             | 10.3%         | 0.41                         |
| <b>Total</b>               | 1833              | 4305          | 11.6%             | 18.5%         | <i>&lt;0.0001</i>            | 26.3%             | 30.1%         | <i>0.003</i>                 | 614               | 7575                 | 41.5%             | 33.5%         | <b><i>&lt;0.0001</i></b>     | 655               | 7538          | 40.0%             | 33.6%         | <b><i>0.001</i></b>          |

The frequency of TMB-H and IRS-H status for selected tumor types (as in Nasser *et al.*, 2022) stratified by self reported race (White or Caucasian as European; Black or African American, Asian, American Indian or Alaskan Native, Native Hawaiian or Other Pacific Islander, or Other as Non-European) from all 24,463 patients in the SCMD (regardless of treatment status) with valid IRS and TMB status at the time of IRS development. The total number of European and Non-European patients with each tumor type are shown, along with the percentage TMB-H and IRS-H. Fisher's exact test *p*-values for differences between European vs. Non-European TMB-H and IRS-H are shown. Significant values are italicized; values where IRS-H or TMB-H is significantly higher in Non-Europeans vs. Europeans are shown in bold italic. Data from Nasser *et al.*, uncorrected tumor only TMB (TMB-H at 20 mutations/Mb, as in 10xGenomics/SCMD) is reported similarly, with separately reported results for self reported race and genetically determined ancestry (Anc.).
