# Supplementary material for: Validation of Immunotherapy Response Score as Predictive of Pan-solid Tumor Anti-PD-1/PD-L1 Benefit
Source: PubMed Central journal article supplement (PMC10367935; doi:10.1158/2767-9764.crc-23-0036), 2023-07-25
Supplement: crc-23-0036-s19.pdf [file crc-23-0036-s19.pdf]

Supplementary Table S10. Demographics and tumor type of the 575 patient anti-PD-(L)1 monotherapy self-reported race validation cohort and the non-European subset

| Variable                     | Statistic                         | Anti-PD-(L)1 cohort<br>n (%) | Non-European Subgroup<br>n (%) |
|------------------------------|-----------------------------------|------------------------------|--------------------------------|
| Age (yrs)                    | n<br>median<br>(IQR)              | 575<br>66 (59-75)            | 47<br>64 (50.5-71)             |
| Sex                          | n (%)                             |                              |                                |
|                              | Female                            | 246 (42.8%)                  | 19 (40.4%)                     |
|                              | Male                              | 329 (57.2%)                  | 28 (59.6%)                     |
| Race                         | n (%)                             |                              |                                |
|                              | Asian                             | 3 (0.5%)                     | 3 (6.4%)                       |
|                              | Black or African American         | 30 (5.2%)                    | 30 (63.8%)                     |
|                              | Other                             | 14 (2.4%)                    | 14 (29.8%)                     |
|                              | Unknown, Missing, or Not Reported | 204 (35.5%)                  |                                |
|                              | White or Caucasian                | 369 (64.2%)                  |                                |
| Ethnicity                    | n (%)                             |                              |                                |
|                              | Hispanic or Latino                | 7 (1.2%)                     | 4 (8.5%)                       |
|                              | Not Hispanic or Latino            | 364 (63.3%)                  | 39 (83.0%)                     |
|                              | Unknown, Missing, or Not Reported | 204 (35.5%)                  | 4 (8.5%)                       |
| Anti-PD-(L)1 line of therapy | n (%)                             |                              |                                |
|                              | 1                                 | 393 (68.3%)                  | 33 (70.2%)                     |
|                              | 2                                 | 126 (21.9%)                  | 9 (19.1%)                      |
|                              | 3+                                | 56 (9.7%)                    | 5 (10.6%)                      |
| Anti-PD-(L)1 therapy type    | n (%)                             |                              |                                |
|                              | pembrolizumab                     | 275 (47.8%)                  | 33 (70.2%)                     |
|                              | other anti-PD-(L)1 therapy        | 300 (52.2%)                  | 14 (29.8%)                     |
| Primary Tumor Type           | n (%)                             |                              |                                |
|                              | Adrenocortical Carcinoma          | 1 (0.2%)                     | 1 (2.1%)                       |
|                              | Ampullary Carcinoma               | 1 (0.2%)                     |                                |
|                              | Appendiceal Cancer                | 1 (0.2%)                     |                                |
|                              | Bladder Cancer                    | 45 (7.8%)                    | 3 (6.4%)                       |
|                              | Breast Cancer                     | 17 (3.0%)                    | 2 (4.3%)                       |
|                              | Cancer of Unknown Primary         | 53 (9.2%)                    | 4 (8.5%)                       |
|                              | Cervical Cancer                   | 7 (1.2%)                     |                                |
|                              | Colorectal Cancer                 | 12 (2.1%)                    | 2 (4.3%)                       |
|                              | Endometrial Cancer                | 4 (0.7%)                     |                                |
|                              | Esophagogastric Cancer            | 22 (3.8%)                    | 1 (2.1%)                       |
|                              | Glioma                            | 3 (0.5%)                     |                                |
|                              | Head and Neck Cancer              | 38 (6.6%)                    | 7 (14.9%)                      |
|                              | Hepatobiliary Cancer              | 13 (2.3%)                    | 3 (6.4%)                       |
|                              | Lymphoma                          | 2 (0.3%)                     |                                |
|                              | Melanoma                          | 87 (15.1%)                   | 1 (2.1%)                       |
|                              | Mesothelioma                      | 2 (0.3%)                     | 1 (2.1%)                       |
|                              | Non-Small Cell Lung Cancer        | 144 (25.0%)                  | 16 (34.0%)                     |
|                              | Other Cancer                      | 8 (1.4%)                     | 2 (4.3%)                       |
|                              | Ovarian Cancer                    | 4 (0.7%)                     |                                |
|                              | Pancreatic Cancer                 | 4 (0.7%)                     | 1 (2.1%)                       |
|                              | Penile Cancer                     | 1 (0.2%)                     |                                |
|                              | Prostate Cancer                   | 2 (0.3%)                     |                                |
|                              | Renal Cell Carcinoma              | 38 (6.6%)                    | 1 (2.1%)                       |
|                              | Salivary Gland Cancer             | 2 (0.3%)                     |                                |
|                              | Sarcoma                           | 13 (2.3%)                    | 2 (4.3%)                       |
|                              | Skin Cancer, Non-Melanoma         | 19 (3.3%)                    |                                |
|                              | Small Cell Lung Cancer            | 22 (3.8%)                    |                                |
|                              | Thymic Tumor                      | 1 (0.2%)                     |                                |
|                              | Thyroid Cancer                    | 1 (0.2%)                     |                                |
|                              | Vaginal Cancer                    | 4 (0.7%)                     |                                |

Demographics and tumor types for all included patients including age (in years), sex, self reported race, self reported ethnicity, and the anti-PD-(L)1 line of systemic therapy. The StrataNGS CGP assigned primary tumor type for each patient is provided. n= sample size, %= percentage, IQR = interquartile range.
