# Supplementary material for: Validation of Immunotherapy Response Score as Predictive of Pan-solid Tumor Anti-PD-1/PD-L1 Benefit
Source: PubMed Central journal article supplement (PMC10367935; doi:10.1158/2767-9764.crc-23-0036), 2023-07-25
Supplement: crc-23-0036-s20.pdf [file crc-23-0036-s20.pdf]

**Supplementary Table S11. Demographics and tumor type of the 1,229 line chemotherapy, anti-PD-(L)1, and chemotherapy + anti-PD-(L)1 validation cohort**

| <b>Variable</b>           | <b>Statistic</b>                  | <b>Overall<br/>n (%)</b> | <b>Chemo<br/>n (%)</b> | <b>anti-PD-(L)1<br/>n (%)</b> | <b>Chemo + anti-<br/>PD-(L)1<br/>n (%)</b> |
|---------------------------|-----------------------------------|--------------------------|------------------------|-------------------------------|--------------------------------------------|
| <b>Age (yrs)</b>          | n<br>median (IQR)                 | 1,229<br>64 (56-72)      | 797<br>64 (55-71)      | 240<br>64 (58-73)             | 192<br>64 (57.5-72)                        |
| <b>Sex</b>                | n (%)                             |                          |                        |                               |                                            |
|                           | Female                            | 630 (51.3%)              | 411 (51.6%)            | 123 (51.2%)                   | 96 (50.0%)                                 |
|                           | Male                              | 599 (48.7%)              | 386 (48.4%)            | 117 (48.7%)                   | 96 (50.0%)                                 |
| <b>Race</b>               | n (%)                             |                          |                        |                               |                                            |
|                           | Asian                             | 19 (1.5%)                | 14 (1.8%)              | 2 (0.8%)                      | 3 (1.6%)                                   |
|                           | Black or African American         | 112 (9.1%)               | 77 (9.7%)              | 18 (7.5%)                     | 17 (8.9%)                                  |
|                           | Other                             | 22 (1.8%)                | 12 (1.5%)              | 6 (2.5%)                      | 4 (2.1%)                                   |
|                           | Unknown, Missing, or Not Reported | 349 (28.4%)              | 226 (28.4%)            | 67 (27.9%)                    | 56 (29.2%)                                 |
|                           | White or Caucasian                | 727 (59.2%)              | 468 (58.7%)            | 147 (61.2%)                   | 112 (58.3%)                                |
| <b>Ethnicity</b>          | n (%)                             |                          |                        |                               |                                            |
|                           | Hispanic or Latino                | 22 (1.8%)                | 15 (1.9%)              | 1 (0.4%)                      | 6 (3.1%)                                   |
|                           | Not Hispanic or Latino            | 779 (63.4%)              | 511 (64.1%)            | 152 (63.3%)                   | 116 (60.4%)                                |
|                           | Unknown, Missing, or Not Reported | 428 (34.8%)              | 271 (34.0%)            | 87 (36.2%)                    | 70 (36.5%)                                 |
| <b>Type of Therapy</b>    | n (%)                             |                          |                        |                               |                                            |
|                           | Chemo                             | 797 (64.8%)              | 797 (100%)             | 0 (0%)                        | 0 (0%)                                     |
|                           | anti-PD-(L)1                      | 240 (19.5%)              | 0 (0%)                 | 240 (100.0%)                  | 0 (0%)                                     |
|                           | Chemo + anti-PD-(L)1              | 192 (15.6%)              | 0 (0%)                 | 0 (0%)                        | 192 (100%)                                 |
| <b>IRS Group</b>          | n (%)                             |                          |                        |                               |                                            |
|                           | Ultralow (UL)                     | 345 (28.1%)              | 246 (30.9%)            | 46 (19.2%)                    | 53 (27.6%)                                 |
|                           | Intermediate Low (UL)             | 494 (40.2%)              | 332 (41.7%)            | 85 (35.4%)                    | 77 (40.1%)                                 |
|                           | High (H)                          | 390 (31.7%)              | 219 (27.5%)            | 109 (45.4%)                   | 62 (32.3%)                                 |
| <b>Line of Therapy</b>    | n (%)                             |                          |                        |                               |                                            |
|                           | 1                                 | 916 (74.5%)              | 602 (75.5%)            | 168 (70.0%)                   | 146 (76.0%)                                |
|                           | 2                                 | 214 (17.4%)              | 129 (16.2%)            | 55 (22.9%)                    | 30 (15.6%)                                 |
|                           | 3+                                | 99 (8.1%)                | 66 (8.3%)              | 17 (7.1%)                     | 16 (8.3%)                                  |
| <b>Primary Tumor Type</b> | n (%)                             |                          |                        |                               |                                            |
|                           | Triple Negative Breast Cancer     | 276 (22.5%)              | 224 (28.1%)            | 13 (5.4%)                     | 39 (20.3%)                                 |
|                           | Esophagogastric Cancer            | 275 (22.4%)              | 229 (28.7%)            | 23 (9.6%)                     | 23 (12.0%)                                 |
|                           | Head and Neck Cancer              | 154 (12.5%)              | 110 (13.8%)            | 38 (15.8%)                    | 6 (3.1%)                                   |
|                           | Non-Small Cell Lung Cancer        | 422 (34.3%)              | 191 (24.0%)            | 144 (60.0%)                   | 87 (45.3%)                                 |
|                           | Small Cell Lung Cancer            | 102 (8.3%)               | 43 (5.4%)              | 22 (9.2%)                     | 37 (19.3%)                                 |

Demographics and tumor types for all 1,229 included therapy lines (from 1,013 patients) in the chemotherapy (chemo), anti-PD-(L)1, or chemo + anti-PD-(L)1 validation cohort including age (in years), sex, self reported race, self reported ethnicity, the included line of systemic therapy, the type of therapy and IRS group (3 group classifier). The StrataNGS CGP assigned primary tumor type for each patient is provided. n= sample size, %= percentage, IQR = interquartile range.
