# Supplementary material for: Validation of Immunotherapy Response Score as Predictive of Pan-solid Tumor Anti-PD-1/PD-L1 Benefit
Source: PubMed Central journal article supplement (PMC10367935; doi:10.1158/2767-9764.crc-23-0036), 2023-07-25
Supplement: crc-23-0036-s21.pdf [file crc-23-0036-s21.pdf]

Supplementary Table S12. Subgroup analysis of the 1,229 line chemotherapy, anti-PD-(L)1, and chemotherapy + anti-PD-(L)1 validation cohort

| Variable                       | Subgroup                    | Comparison                  | IRS-UL            |       |             |             |            | IRS-IL |                |       |             |             | IRS-H      |        |                |       |             |             |            |         |        |
|--------------------------------|-----------------------------|-----------------------------|-------------------|-------|-------------|-------------|------------|--------|----------------|-------|-------------|-------------|------------|--------|----------------|-------|-------------|-------------|------------|---------|--------|
|                                |                             |                             | Treatments (n)    | aHR   | 95%CI Lower | 95%CI Upper | Events (n) | P      | Treatments (n) | aHR   | 95%CI Lower | 95%CI Upper | Events (n) | P      | Treatments (n) | aHR   | 95%CI Lower | 95%CI Upper | Events (n) | P       |        |
| All                            |                             | PD-(L)1 + Chemo vs. Chemo   | 345               | 1.012 | 0.675       | 1.517       | 228        | 0.9551 | 494            | 0.658 | 0.460       | 0.943       | 304        | 0.0225 | 390            | 0.610 | 0.409       | 0.911       | 218        | 0.0157  |        |
|                                |                             | PD-(L)1 + Chemo vs. PD-(L)1 |                   | 0.815 | 0.481       | 1.379       |            | 0.4455 |                | 0.876 | 0.585       | 1.310       |            | 0.5182 |                | 1.503 | 0.943       | 2.395       |            | 0.087   |        |
|                                |                             | PD-(L)1 vs. Chemo           |                   | 1.242 | 0.814       | 1.895       |            | 0.3151 |                | 0.752 | 0.543       | 1.041       |            | 0.0858 |                | 0.406 | 0.280       | 0.589       |            | <0.0001 |        |
| Line of Therapy                | 1st Line                    | PD-(L)1 + Chemo vs. Chemo   | 237               | 0.819 | 0.478       | 1.404       | 151        | 0.4681 | 363            | 0.654 | 0.437       | 0.979       | 221        | 0.0392 | 316            | 0.591 | 0.376       | 0.929       | 173        | 0.0226  |        |
|                                |                             | PD-(L)1 + Chemo vs. PD-(L)1 |                   | 0.743 | 0.374       | 1.475       |            | 0.3953 |                | 0.948 | 0.581       | 1.548       |            | 0.8317 |                | 1.487 | 0.877       | 2.522       |            | 0.141   |        |
|                                |                             | PD-(L)1 vs. Chemo           |                   | 1.103 | 0.634       | 1.919       |            | 0.7289 |                | 0.690 | 0.458       | 1.040       |            | 0.0762 |                | 0.397 | 0.262       | 0.602       |            | <0.0001 |        |
| >1st line                      | PD-(L)1 + Chemo vs. Chemo   | 108                         | 1.663             | 0.877 | 3.153       | 77          | 0.1195     | 131    | 0.690          | 0.305 | 1.557       | 83          | 0.3711     | 74     | 1.270          | 0.456 | 3.534       | 45          | 0.6472     |         |        |
|                                | PD-(L)1 + Chemo vs. PD-(L)1 |                             | 1.237             | 0.527 | 2.905       |             | 0.6254     |        | 0.664          | 0.299 | 1.472       |             | 0.3131     |        | 2.496          | 0.717 | 8.681       |             | 0.1505     |         |        |
|                                | PD-(L)1 vs. Chemo           |                             | 1.344             | 0.689 | 2.623       |             | 0.3859     |        | 1.039          | 0.558 | 1.934       |             | 0.9038     |        | 0.509          | 0.149 | 1.738       |             | 0.2809     |         |        |
| Tumor Type                     | NSCLC                       | PD-(L)1 + Chemo vs. Chemo   | 50                | 0.620 | 0.194       | 1.986       | 30         | 0.4211 | 156            | 0.607 | 0.337       | 1.094       | 105        | 0.0967 | 216            | 0.551 | 0.321       | 0.946       | 117        | 0.0307  |        |
|                                |                             | PD-(L)1 + Chemo vs. PD-(L)1 |                   | 0.394 | 0.117       | 1.326       |            | 0.1324 |                | 0.559 | 0.303       | 1.031       |            | 0.0627 |                | 1.206 | 0.687       | 2.119       |            | 0.5143  |        |
|                                |                             | PD-(L)1 vs. Chemo           |                   | 1.576 | 0.601       | 4.128       |            | 0.355  |                | 1.086 | 0.667       | 1.768       |            | 0.7396 |                | 0.457 | 0.289       | 0.721       |            | 0.0008  |        |
|                                | Remaining 4                 | PD-(L)1 + Chemo vs. Chemo   | 295               | 0.990 | 0.656       | 1.495       | 198        | 0.9617 | 338            | 0.699 | 0.459       | 1.065       | 0          | 0.0954 | 174            | 0.628 | 0.349       | 1.127       | 101        | 0.119   |        |
|                                |                             | PD-(L)1 + Chemo vs. PD-(L)1 |                   | 0.837 | 0.472       | 1.484       |            | 0.5416 |                | 1.199 | 0.674       | 2.132       |            | 0.537  |                | 2.385 | 0.996       | 5.711       |            | 0.051   |        |
|                                |                             | PD-(L)1 vs. Chemo           |                   | 1.183 | 0.737       | 1.900       |            | 0.4857 |                | 0.583 | 0.369       | 0.922       |            | 0.0211 |                | 0.263 | 0.126       | 0.551       |            | 0.0004  |        |
|                                | Esophagago.                 | PD-(L)1 + Chemo vs. Chemo   | 93                | 0.938 | 0.219       | 4.023       | 67         | 0.9309 | 122            | 1.867 | 0.763       | 4.566       | 78         | 0.1716 |                |       |             |             |            |         |        |
|                                |                             | PD-(L)1 + Chemo vs. PD-(L)1 |                   | 0.368 | 0.075       | 1.809       |            | 0.2184 |                | 4.219 | 1.148       | 15.504      |            | 0.0302 |                |       |             |             |            |         |        |
|                                |                             | PD-(L)1 vs. Chemo           |                   | 2.551 | 1.228       | 5.299       |            | 0.0121 |                | 0.442 | 0.173       | 1.129       |            | 0.088  |                |       |             |             |            |         |        |
|                                | Remaining 3                 | PD-(L)1 + Chemo vs. Chemo   | 202               | 0.990 | 0.625       | 1.568       | 131        | 0.9659 | 216            | 0.549 | 0.322       | 0.936       | 121        | 0.0275 |                |       |             |             |            |         |        |
|                                |                             | PD-(L)1 + Chemo vs. PD-(L)1 |                   | 1.318 | 0.641       | 2.710       |            | 0.4526 |                | 1.131 | 0.576       | 2.222       |            | 0.7206 |                |       |             |             |            |         |        |
|                                |                             | PD-(L)1 vs. Chemo           |                   | 0.751 | 0.381       | 1.480       |            | 0.4083 |                | 0.485 | 0.273       | 0.862       |            | 0.0136 |                |       |             |             |            |         |        |
| Age                            | <65 yrs                     | PD-(L)1 + Chemo vs. Chemo   | 211               | 1.004 | 0.592       | 1.702       | 141        | 0.9891 | 252            | 0.928 | 0.562       | 1.532       | 148        | 0.7689 | 184            | 0.990 | 0.567       | 1.728       | 98         | 0.9705  |        |
|                                |                             | PD-(L)1 + Chemo vs. PD-(L)1 |                   | 0.992 | 0.490       | 2.009       |            | 0.9824 |                | 1.176 | 0.661       | 2.093       |            | 0.5804 |                | 2.189 | 1.123       | 4.266       |            | 0.0214  |        |
|                                |                             | PD-(L)1 vs. Chemo           |                   | 1.012 | 0.575       | 1.780       |            | 0.9679 |                | 0.788 | 0.492       | 1.262       |            | 0.3223 |                | 0.452 | 0.263       | 0.778       |            | 0.0042  |        |
| >=65 yrs                       | PD-(L)1 + Chemo vs. Chemo   | 134                         | 1.093             | 0.556 | 2.145       | 87          | 0.7971     | 242    | 0.468          | 0.277 | 0.790       | 146         | 0.0045     | 206    | 0.362          | 0.199 | 0.658       | 120         | 0.0009     |         |        |
|                                | PD-(L)1 + Chemo vs. PD-(L)1 |                             | 0.604             | 0.254 | 1.438       |             | 0.2545     |        | 0.637          | 0.353 | 1.150       |             | 0.1344     |        | 1.072          | 0.551 | 2.086       |             | 0.8377     |         |        |
|                                | PD-(L)1 vs. Chemo           |                             | 1.809             | 0.886 | 3.693       |             | 0.1037     |        | 0.735          | 0.462 | 1.169       |             | 0.1928     |        | 0.338          | 0.198 | 0.576       |             | 0.0001     |         |        |
| Gender                         | Male                        | PD-(L)1 + Chemo vs. Chemo   | 143               | 0.691 | 0.334       | 1.430       | 93         | 0.3189 | 240            | 1.245 | 0.737       | 2.102       | 155        | 0.4126 | 216            | 0.548 | 0.312       | 0.964       | 121        | 0.0368  |        |
|                                |                             | PD-(L)1 + Chemo vs. PD-(L)1 |                   | 1.005 | 0.430       | 2.353       |            | 0.9901 |                | 1.823 | 0.975       | 3.408       |            | 0.0601 |                | 1.083 | 0.566       | 2.069       |            | 0.8103  |        |
|                                |                             | PD-(L)1 vs. Chemo           |                   | 0.687 | 0.353       | 1.337       |            | 0.2692 |                | 0.683 | 0.407       | 1.146       |            | 0.149  |                | 0.506 | 0.310       | 0.827       |            | 0.0066  |        |
| Female                         | PD-(L)1 + Chemo vs. Chemo   | 202                         | 1.113             | 0.672 | 1.846       | 135         | 0.677      | 254    | 0.434          | 0.253 | 0.745       | 149         | 0.0025     | 174    | 0.722          | 0.400 | 1.302       | 97          | 0.2786     |         |        |
|                                | PD-(L)1 + Chemo vs. PD-(L)1 |                             | 0.582             | 0.287 | 1.178       |             | 0.1326     |        | 0.505          | 0.278 | 0.914       |             | 0.0242     |        | 2.408          | 1.198 | 4.843       |             | 0.0137     |         |        |
|                                | PD-(L)1 vs. Chemo           |                             | 1.913             | 1.063 | 3.442       |             | 0.0304     |        | 0.860          | 0.548 | 1.352       |             | 0.5142     |        | 0.300          | 0.167 | 0.537       |             | 0.0001     |         |        |
| PD-L1 qTP expression (tertile) | 1                           | PD-(L)1 + Chemo vs. Chemo   | 248               | 1.152 | 0.720       | 1.844       | 165        | 0.5556 | 239            | 0.783 | 0.491       | 1.247       | 161        | 0.3026 | 97             | 0.928 | 0.448       | 1.922       | 58         | 0.8407  |        |
|                                |                             | PD-(L)1 + Chemo vs. PD-(L)1 |                   | 0.997 | 0.502       | 1.981       |            | 0.9934 |                | 0.980 | 0.569       | 1.687       |            | 0.9421 |                | 2.639 | 0.914       | 7.622       |            | 0.0729  |        |
|                                |                             | PD-(L)1 vs. Chemo           |                   | 1.155 | 0.643       | 2.076       |            | 0.6293 |                | 0.799 | 0.489       | 1.305       |            | 0.3694 |                | 0.352 | 0.143       | 0.866       |            | 0.023   |        |
|                                | 2                           | PD-(L)1 + Chemo vs. Chemo   | 137               |       | 0.445       | 0.190       | 1.040      | 70     | 0.0616         |       | 0.461       | 0.177       | 1.197      | 70     | 0.1117         | 123   | 0.872       | 0.426       | 1.785      | 69      | 0.7081 |
|                                |                             | PD-(L)1 + Chemo vs. PD-(L)1 |                   | 0.965 | 0.480       | 1.944       | 0.9213     |        | 0.403          |       | 0.189       | 0.857       | 0.0183     |        |                |       |             |             |            |         |        |
|                                |                             | PD-(L)1 vs. Chemo           |                   |       | 0.380       | 0.133       | 1.088      |        | 0.0715         |       | 0.279       | 0.126       | 0.618      |        | 0.0016         |       |             |             |            |         |        |
|                                | 3                           | PD-(L)1 + Chemo vs. Chemo   | 118               |       | 0.628       | 0.222       | 1.777      | 73     | 0.3811         |       | 0.604       | 0.309       | 1.181      | 73     | 0.1406         | 170   | 0.734       | 0.331       | 1.628      | 91      | 0.4473 |
|                                |                             | PD-(L)1 + Chemo vs. PD-(L)1 |                   |       | 0.714       | 0.306       | 1.669      |        | 0.4373         |       |             |             |            |        |                |       |             |             |            |         |        |
|                                |                             | PD-(L)1 vs. Chemo           |                   |       | 0.557       | 0.215       | 1.445      |        | 0.229          |       |             |             |            |        |                |       |             |             |            |         |        |
|                                | PD-L1 tert 2 or 3           | PD-(L)1 + Chemo vs. Chemo   | 97                |       | 1.282       | 0.660       | 2.492      | 63     | 0.4638         |       |             |             |            |        |                |       |             |             |            |         |        |
|                                |                             | PD-(L)1 + Chemo vs. PD-(L)1 |                   |       |             |             |            |        |                |       |             |             |            |        |                |       |             |             |            |         |        |
|                                |                             |                             | PD-(L)1 vs. Chemo |       |             |             |            |        |                |       |             |             |            |        |                |       |             |             |            |         |        |

Subgroup analysis of the 1,229 line chemotherapy, anti-PD-(L)1, and chemotherapy + anti-PD-(L)1 validation cohort (from Figure) 4 is shown. For all subgroups (those with  $\geq 50$  treatment lines per IRS group are shown), the number of treatment lines in the subgroup, the adjusted hazard ratio (aHR), 95% lower and upper confidence intervals (CI), the number of events in the subgroup, and the p-value (those significant in green) are shown. When  $< 50$  treatment lines per group were present, remaining groups were combined and shown (as indicated).
